# Supplementary material for: Biomimetic diversity-oriented synthesis of benzannulated medium rings via ring expansion
Source: Springer Nature journal article supplement (doi:10.1038/nchembio.1130), 2012-11-18
Supplement: 41589_2013_BFnchembio1130_MOESM7_ESM.mol [file 41589_2013_BFnchembio1130_MOESM7_ESM.mol]

  ChemDraw11051207252D

 15 17  0  0  0  0  0  0  0  0999 V2000
   -1.0717   -0.9105    0.0000 C   0  0  0  0  0  0  0  0  0  0  0  0
   -0.3572   -1.3230    0.0000 C   0  0  0  0  0  0  0  0  0  0  0  0
    0.3572   -0.9105    0.0000 C   0  0  0  0  0  0  0  0  0  0  0  0
    0.3572   -0.0855    0.0000 C   0  0  0  0  0  0  0  0  0  0  0  0
   -0.3572    0.3270    0.0000 C   0  0  0  0  0  0  0  0  0  0  0  0
   -1.0717   -0.0855    0.0000 C   0  0  0  0  0  0  0  0  0  0  0  0
    1.0717    0.3270    0.0000 C   0  0  0  0  0  0  0  0  0  0  0  0
    1.0717   -1.3230    0.0000 C   0  0  0  0  0  0  0  0  0  0  0  0
    1.7862   -0.0855    0.0000 C   0  0  0  0  0  0  0  0  0  0  0  0
   -0.1277    0.5819    0.0000 O   0  0  0  0  0  0  0  0  0  0  0  0
    1.0419    1.1515    0.0000 C   0  0  0  0  0  0  0  0  0  0  0  0
   -1.7862   -1.3230    0.0000 O   0  0  0  0  0  0  0  0  0  0  0  0
    1.7862   -0.9105    0.0000 C   0  0  0  0  0  0  0  0  0  0  0  0
    0.2349    1.3230    0.0000 C   0  0  0  0  0  0  0  0  0  0  0  0
    1.6551    0.9104    0.0000 C   0  0  0  0  0  0  0  0  0  0  0  0
  1  2  1  0      
  2  3  2  0      
  3  4  1  0      
  4  5  1  0      
  5  6  2  0      
  6  1  1  0      
  4  7  1  0      
  3  8  1  0      
  7  9  1  0      
  7 11  1  1      
  1 12  2  0      
  8 13  1  0      
 13  9  1  0      
 11 14  1  0      
  4 10  1  1      
 10 14  1  0      
  7 15  1  6      
M  END
